# Supplementary material
Source: Springer Nature journal article supplement (https://www.springermedizin.de/resource/supplementary/13045_2013_355_MOESM8_ESM.pdf/9661200)
Supplement: MOESM8 [file 9661200]

## Additional file 8

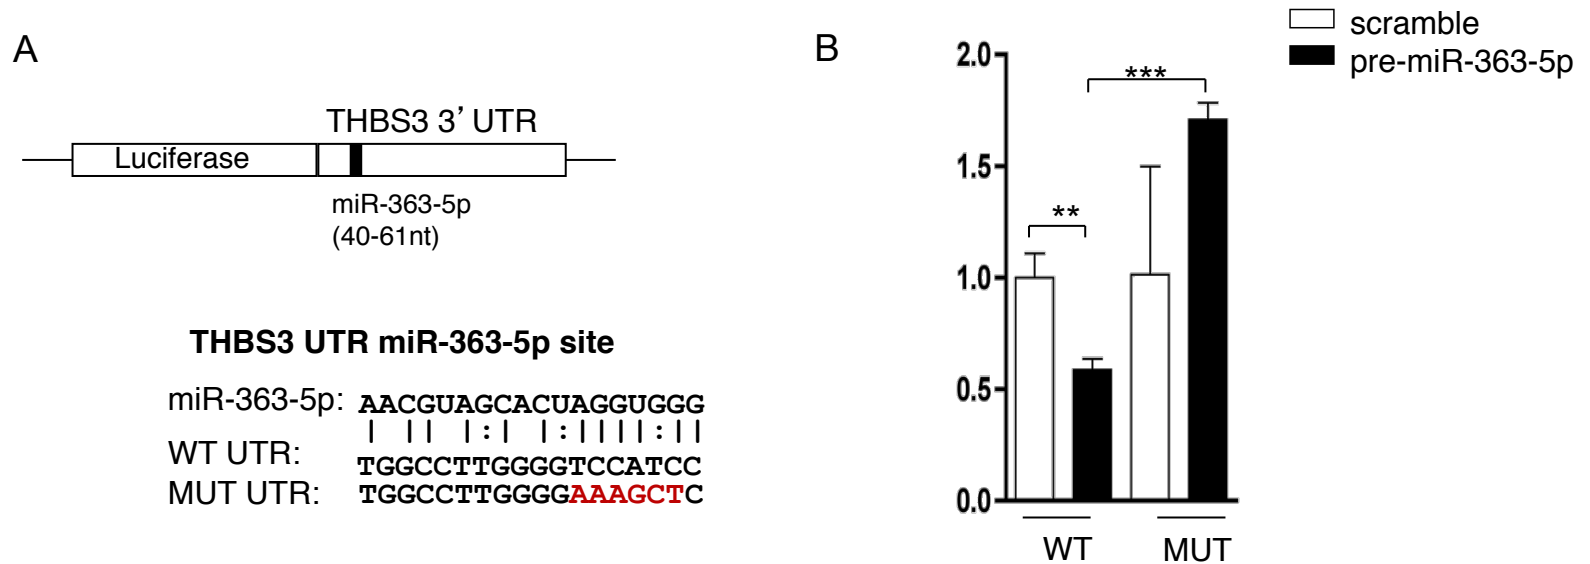

**Additional file 8 - miR-363-5p regulates thrombospondin-3 (THBS3).** (A) Schematic view of the THBS3 construct into pMIR-REPORT showing the predicted binding site in the 3'UTR. Sequence alignment of miR-363-5p and the 3'UTR THBS3 is shown. Nucleotide mutations achieved by site-directed mutagenesis are colored in red. (B) Renilla luciferase activity normalized to Firefly activity of HUVEC 48h post-transfection with pre-miR-363-5p relative to scramble control. Relative luciferase activity of wild-type and mutated 3'UTR constructs are shown. Errors bars are s.e.m. from three independent transfection experiments. \*  $P \leq 0.05$ , \*\*\*  $P \leq 0.001$  by Student's t test.
